# Supplementary material
Source: PubMed Central journal article supplement (PMC11113443)

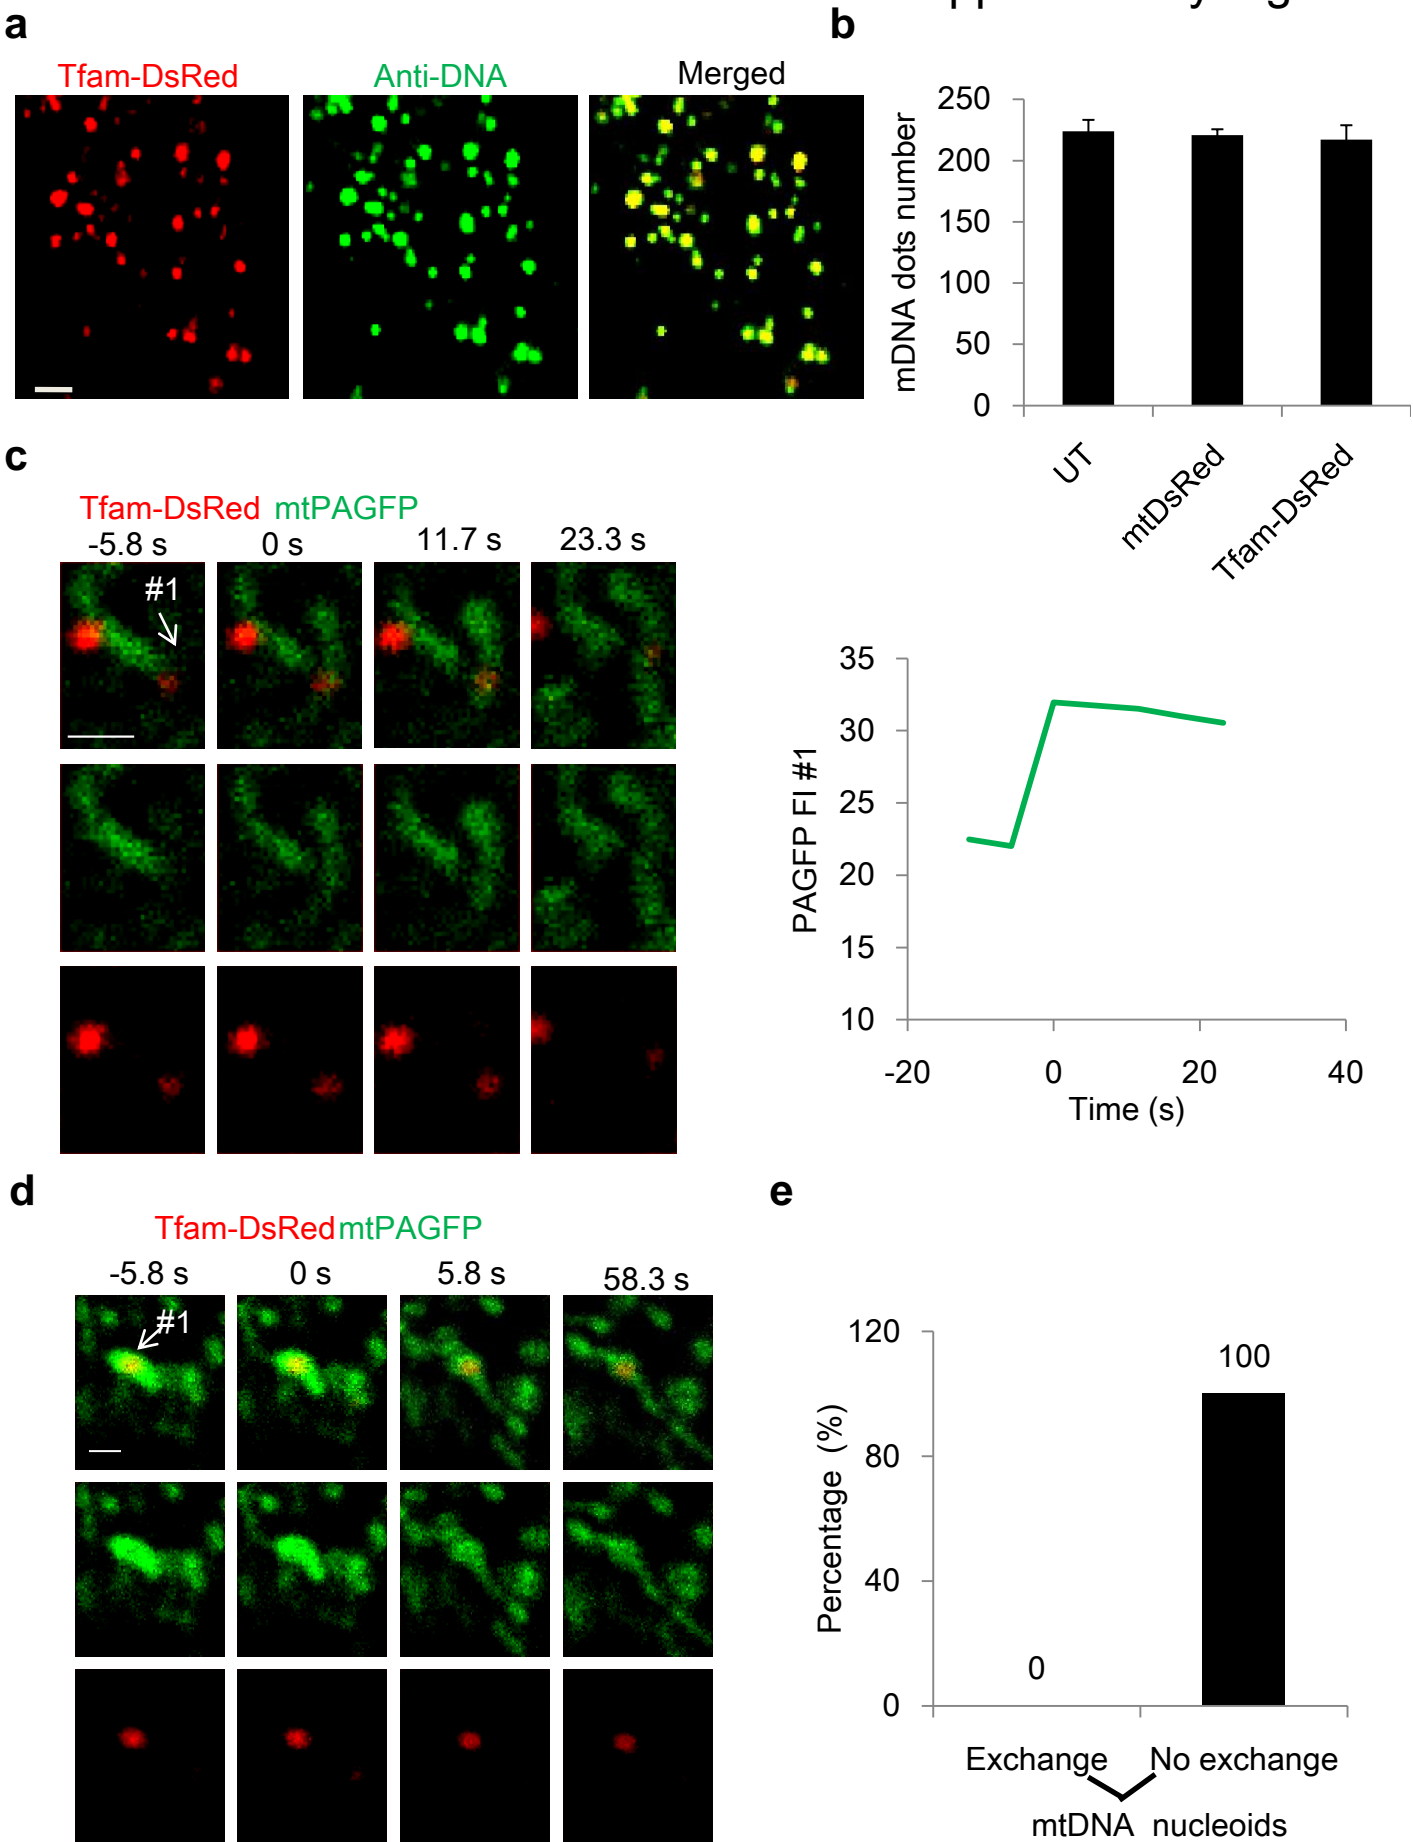

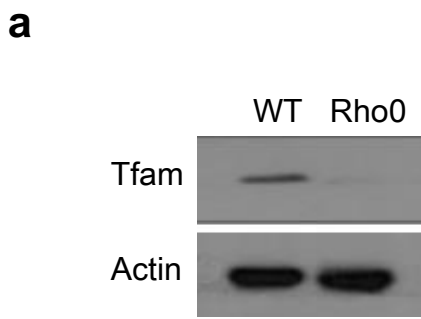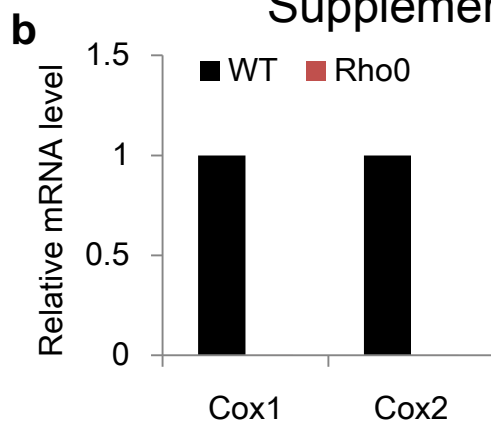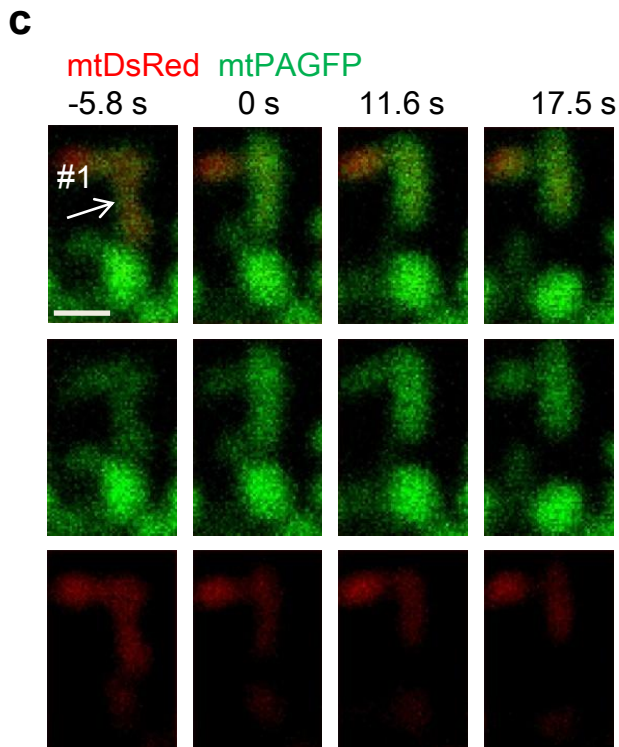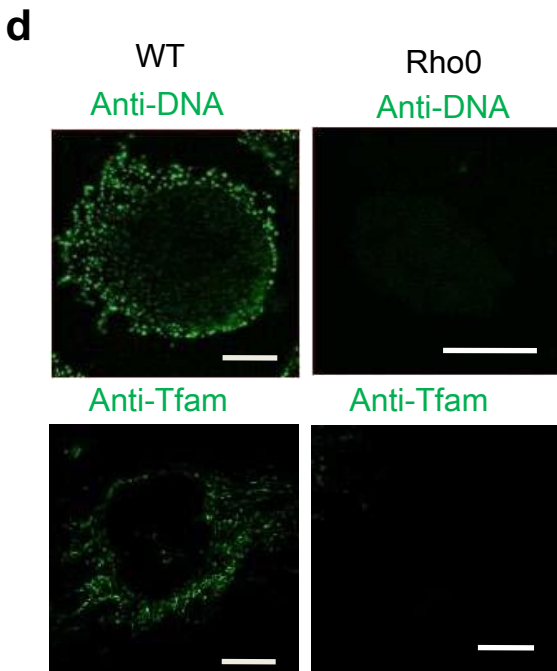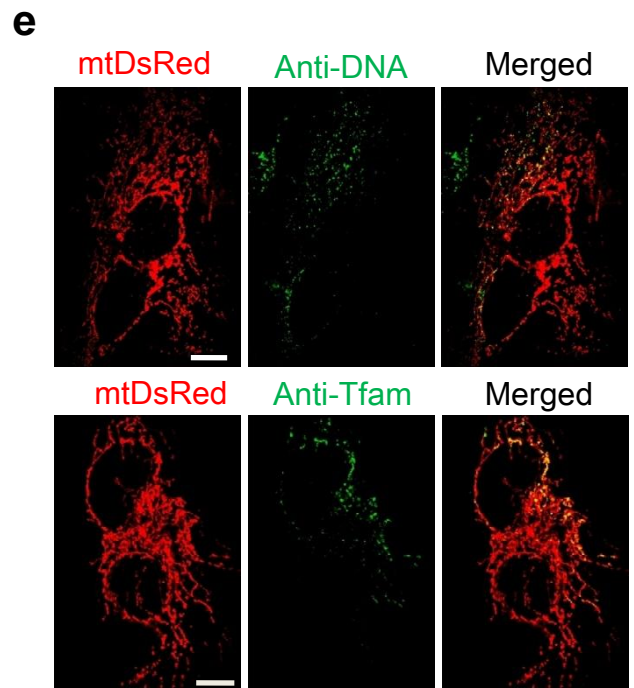

**a**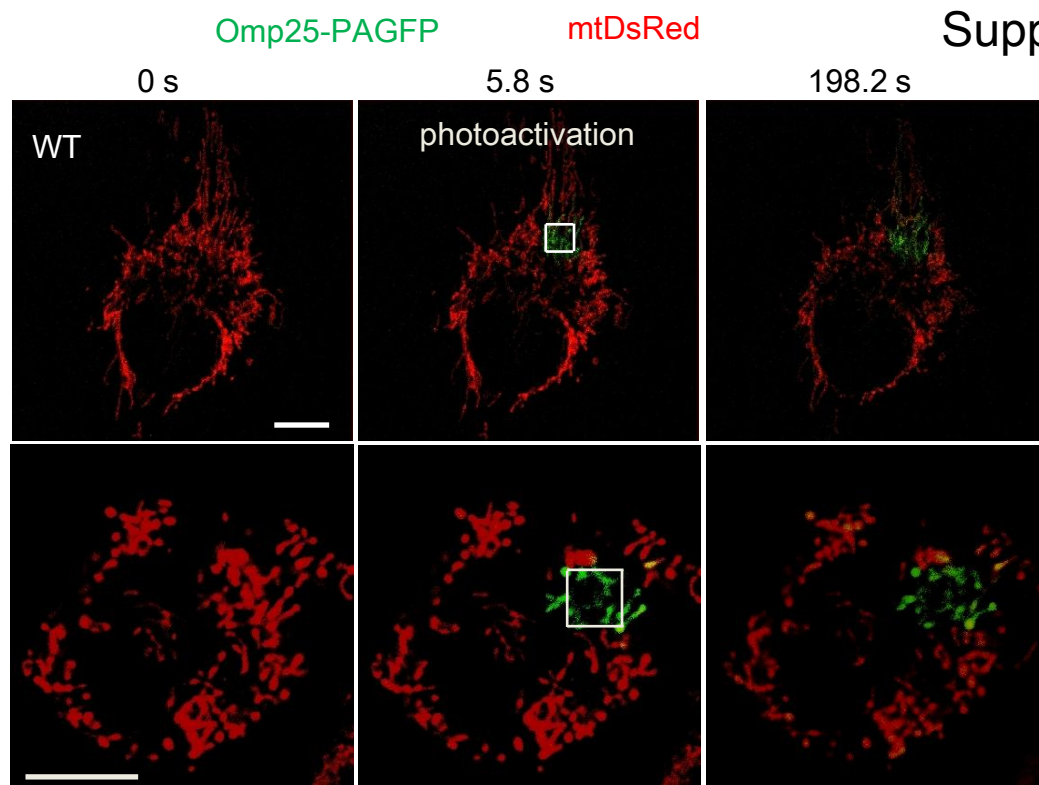**b**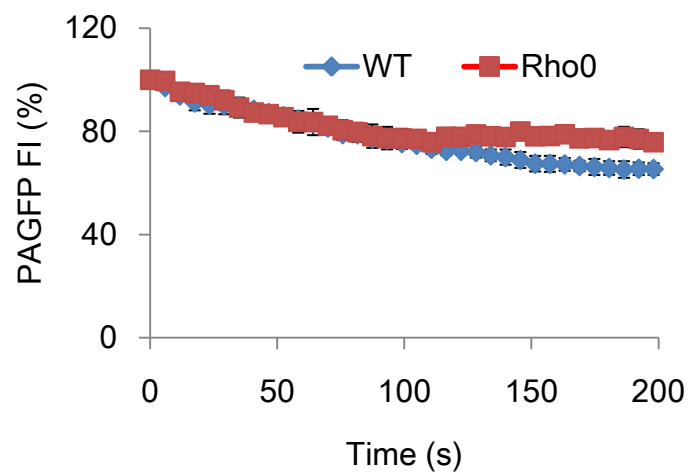**c**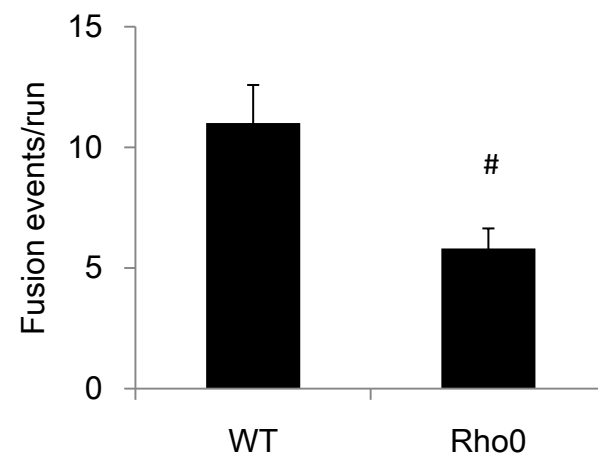

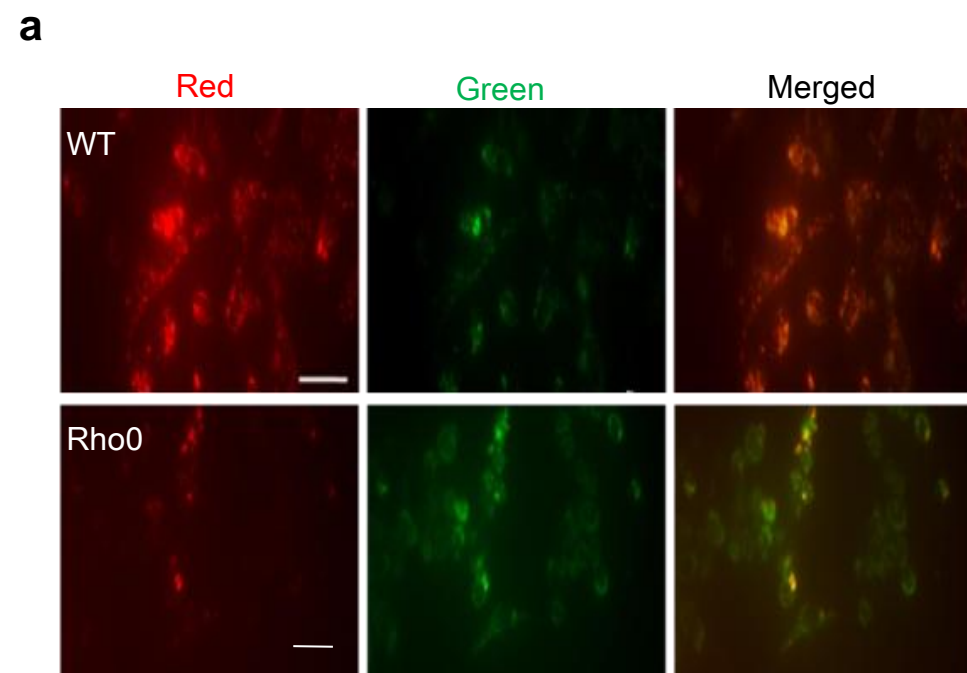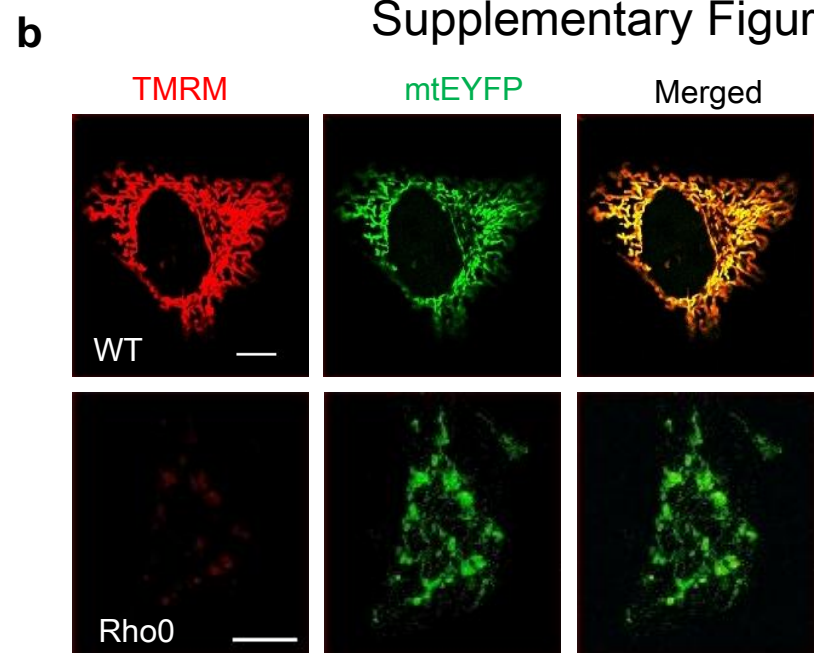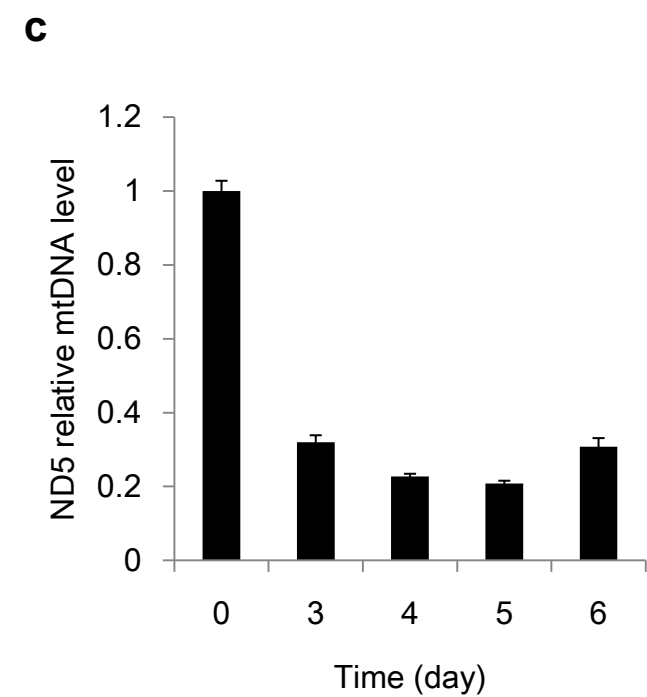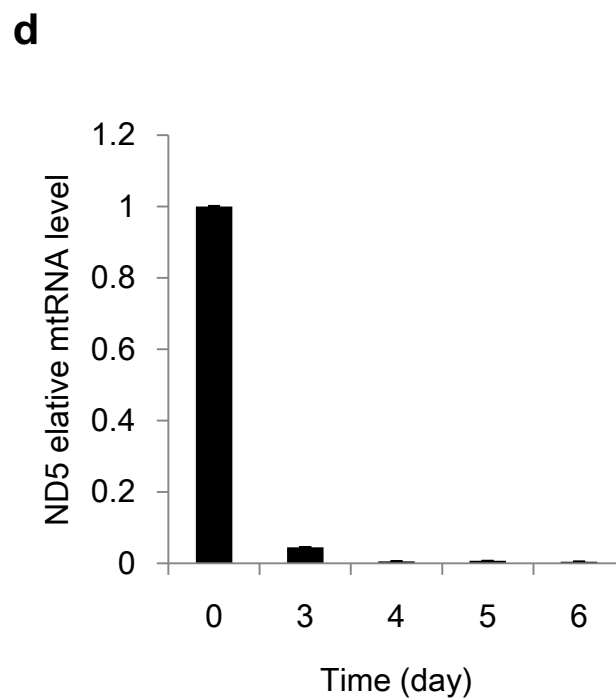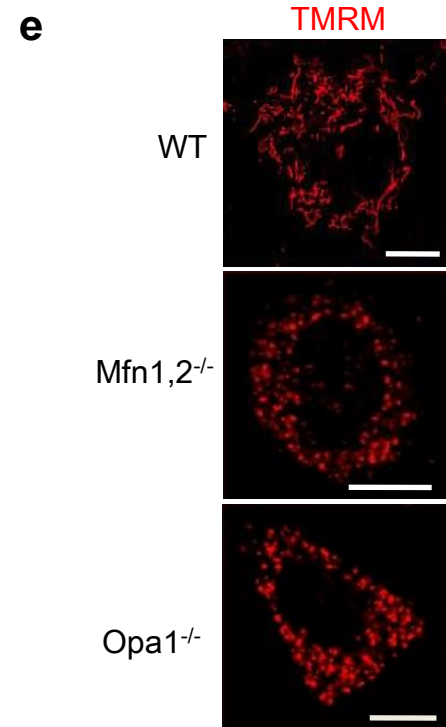

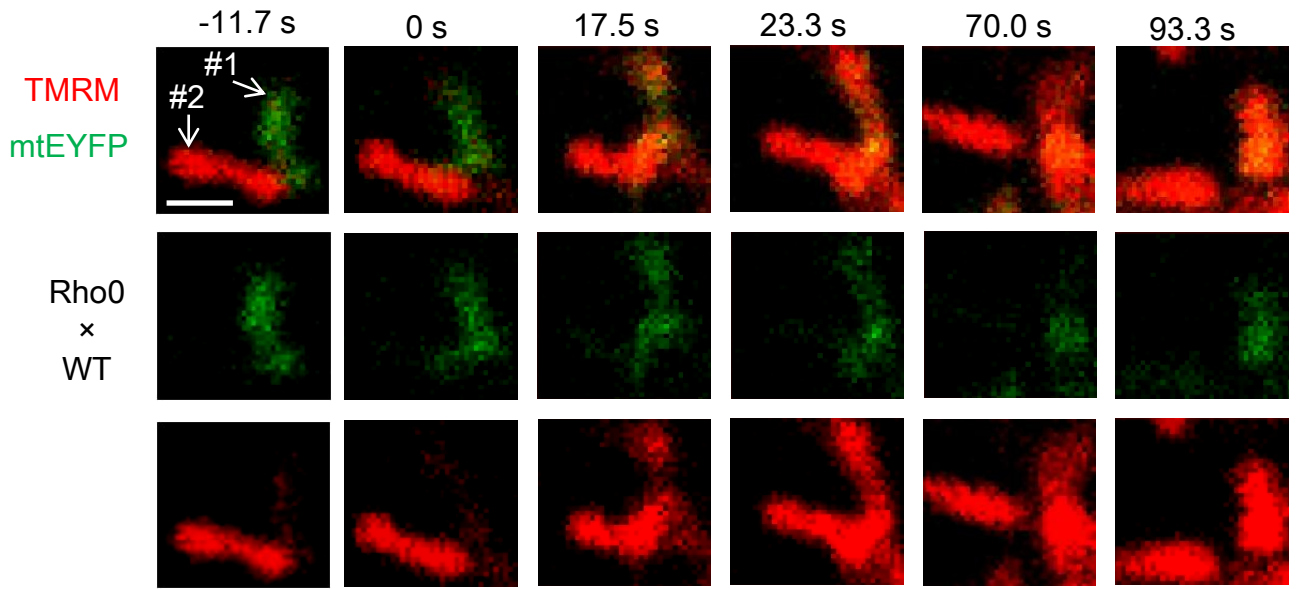

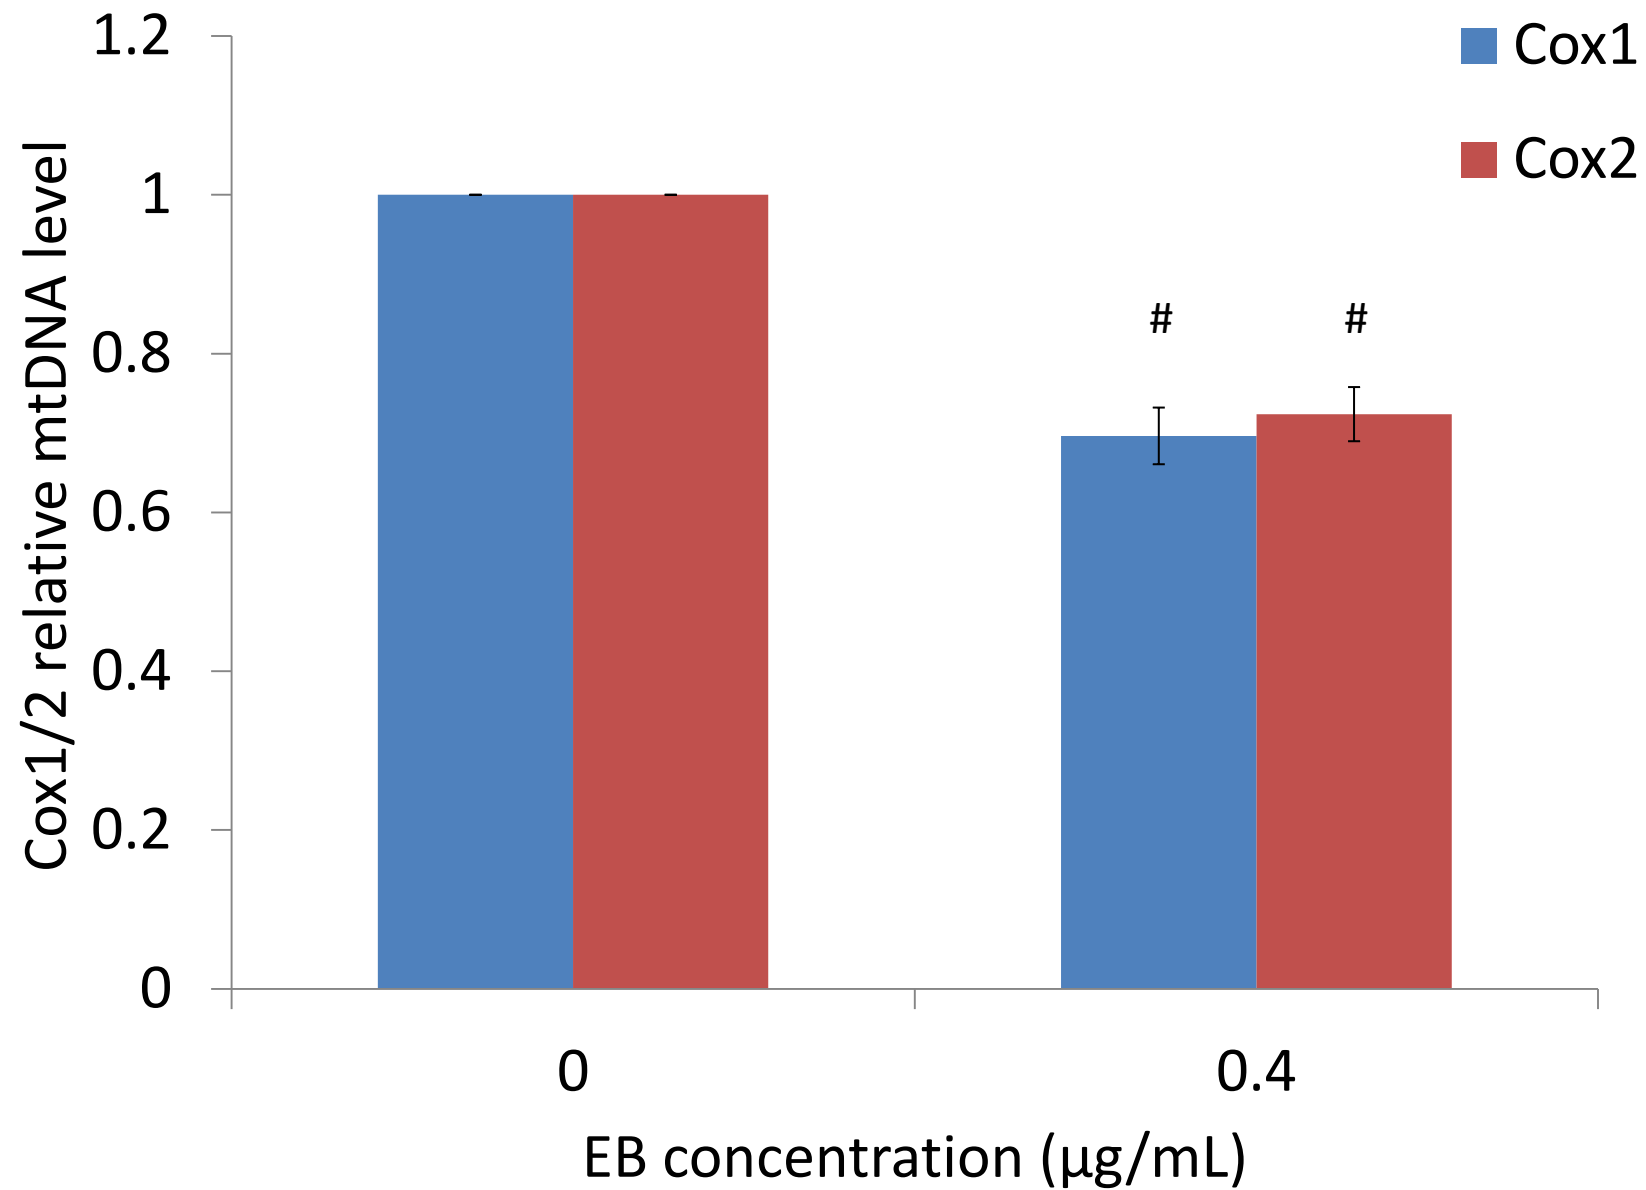

a

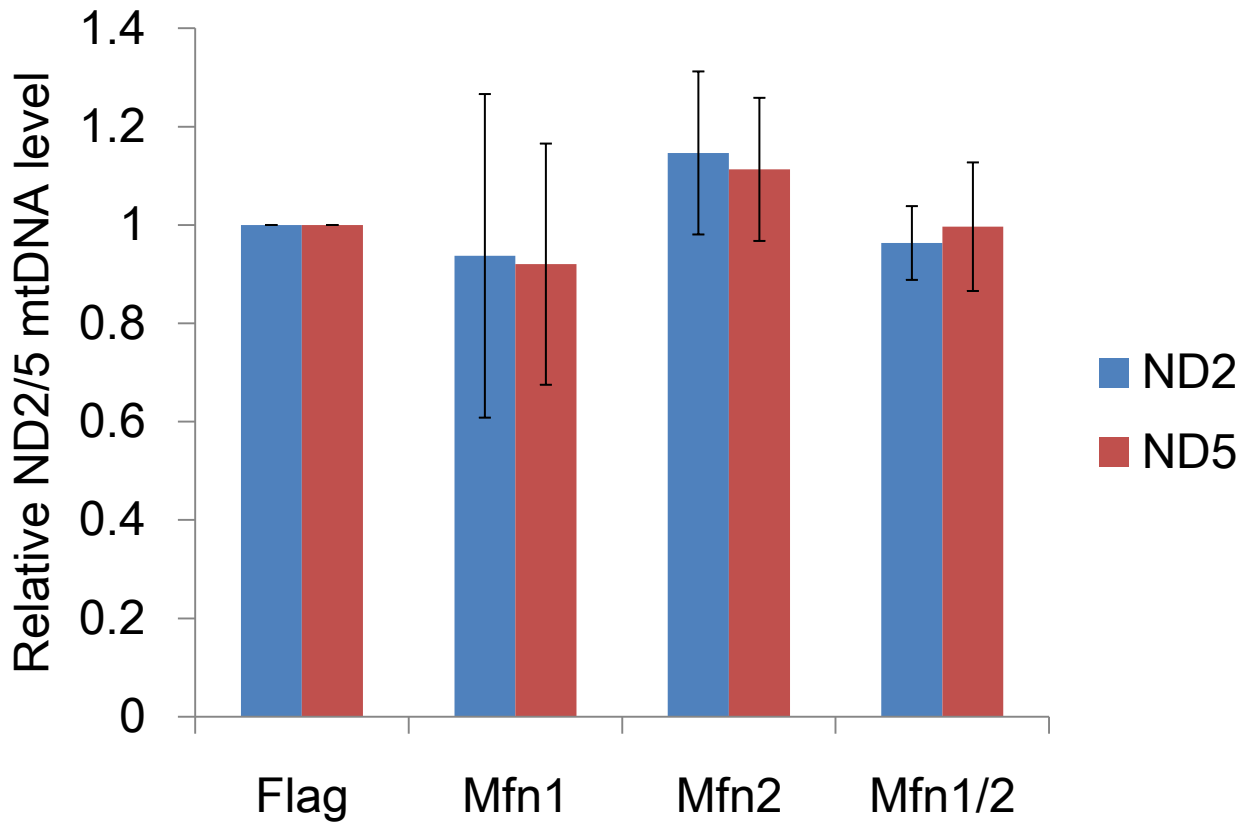

b

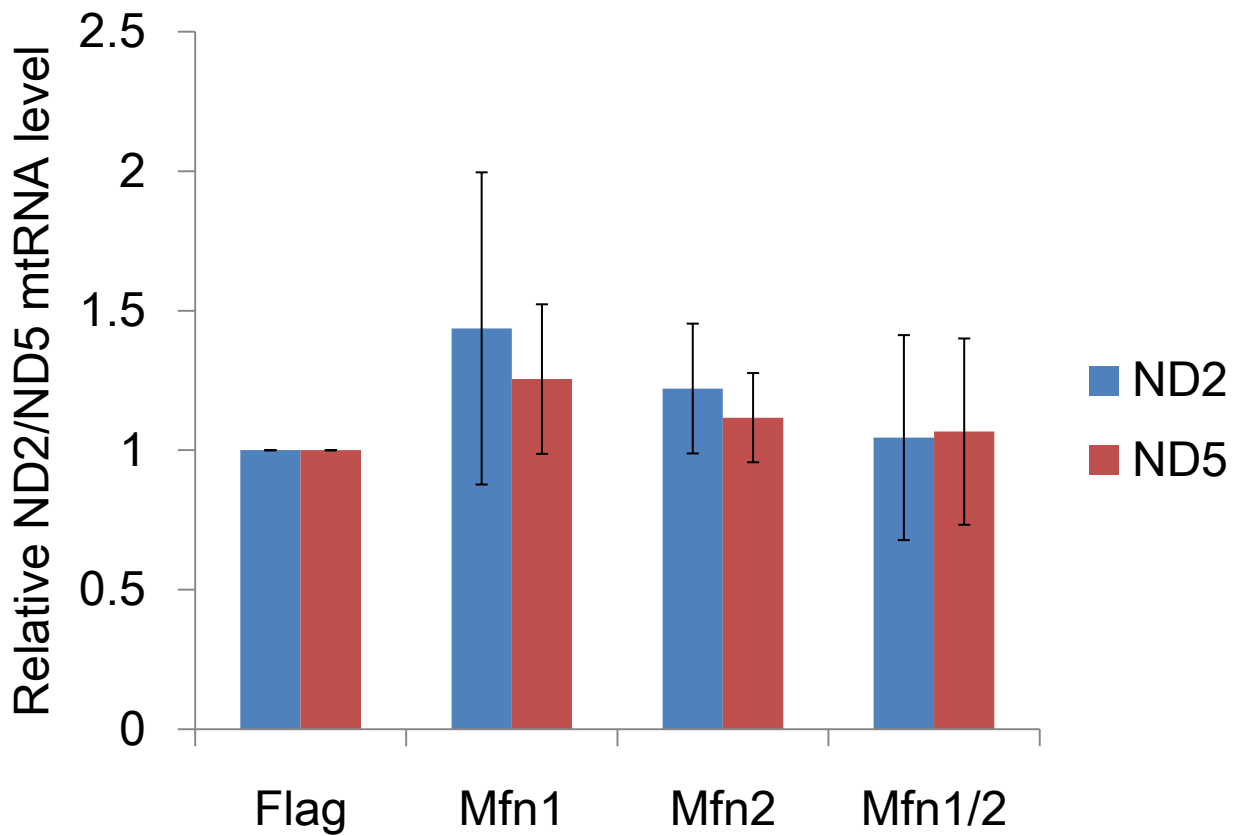

Supplement: 18_2015_1863_MOESM1_ESM.pdf [file 18_2015_1863_MOESM1_ESM.pdf]
